# Supplementary material for: Variability in development of the striped rice borer, Chilo suppressalis (Lepidoptera: Pyralidae), due to instar number and last instar duration
Source: PubMed Central journal article supplement (PMC5059691; doi:10.1038/srep35231), 2016-10-12
Supplement: srep35231-s1.pdf [file srep35231-s1.pdf]

# Variability in development of the striped rice borer, *Chilo suppressalis* (Lepidoptera: Pyralidae), due to instar number and last instar duration

Guang-Hua Luo \*, Jing Yao, Qiong Yang, Zhi-Chun Zhang, Ary A. Hoffmann, Ji-Chao Fang\*

Table S1 The developmental durations of some special *C. suppressalis* individuals

| Populations               | Developmental durations of each instar (days) * |                 |                 |                 |                 |                 |                 |                 |                 | Finally                              |
|---------------------------|-------------------------------------------------|-----------------|-----------------|-----------------|-----------------|-----------------|-----------------|-----------------|-----------------|--------------------------------------|
|                           | 1 <sup>st</sup>                                 | 2 <sup>nd</sup> | 3 <sup>rd</sup> | 4 <sup>th</sup> | 5 <sup>th</sup> | 6 <sup>th</sup> | 7 <sup>th</sup> | 8 <sup>th</sup> | 9 <sup>th</sup> |                                      |
| Individual 1              | 3                                               | 5               | 4               | 3               | 4               | 4               | 14              | 31              | -               | Pupated at 8 <sup>th</sup> on day 31 |
| Individual 2              | 3                                               | 3               | 4               | 4               | 4               | 15              | 17              | 12              | 20              | Died on day 20 at 9 <sup>th</sup>    |
| <i>Fie-P</i> Individual 3 | 3                                               | 3               | 3               | 4               | 4               | 12              | 10              | 26              | -               | Died on day 26 at 8 <sup>th</sup>    |
| Individual 4              | 2                                               | 4               | 3               | 3               | 2               | 2               | 32              | -               | -               | Died on day 32 at 7 <sup>th</sup>    |
| Individual 5              | 3                                               | 5               | 2               | 3               | 4               | 3               | 17              | -               | -               | Died on day 17 at 7 <sup>th</sup>    |
| <i>Ind-P</i> Individual 1 | 3                                               | 3               | 6               | 4               | 5               | 6               | 36              | -               | -               | Died on day 36 at 7 <sup>th</sup>    |
| Individual 2              | 3                                               | 2               | 3               | 3               | 7               | 13              | 10              | -               | -               | Died on day 10 at 7 <sup>th</sup>    |

“-” stands for no data. Data in shadow are the developmental durations in the last instar.

Table S2 The correlation of the duration between the sum to the penultimate instar from the first instar and the total development process

| Instar of pupation     | Population   | Sex | Pearson Correlation | P-value |
|------------------------|--------------|-----|---------------------|---------|
|                        |              |     | Coefficients        |         |
| 5 <sup>th</sup> Instar | <i>Ind-P</i> | ♀   | 0.332               | P=0.268 |
|                        |              | ♂   | 0.466               | P=0.004 |
|                        | <i>Fie-P</i> | ♀   | -0.044              | P=0.904 |
|                        |              | ♂   | -0.071              | P=0.786 |
| 6 <sup>th</sup> Instar | <i>Ind-P</i> | ♀   | 0.402               | P=0.009 |
|                        |              | ♂   | -0.036              | P=0.886 |
|                        | <i>Fie-P</i> | ♀   | -0.015              | P=0.932 |
|                        |              | ♂   | 0.353               | P=0.044 |
| 7 <sup>th</sup> Instar | <i>Ind-P</i> | ♀   | -                   | -       |
|                        |              | ♂   | -                   | -       |
|                        | <i>Fie-P</i> | ♀   | 0.540               | P=0.167 |
|                        |              | ♂   | -                   | -       |

“-” stands for no data.
